# Supplementary material
Source: HighWire-hosted journal article supplement (https://gh.bmj.com/content/5/5/e002209)
Supplement: inline-supplementary-material-2 [file inline-supplementary-material-2.pdf]

## SUPPLEMENTARY FILE 2: SENSITIVITY ANALYSIS

|                                 | Urban Areas |                  | Rural Areas |                  |
|---------------------------------|-------------|------------------|-------------|------------------|
|                                 | Estimate    | 95% CI           | Estimate    | 95% CI           |
| <b>Coefficients (b)</b>         |             |                  |             |                  |
| Opt-out constant                | -5.828***   | -6.402 to -5.254 | -6.923***   | -7.789 to -6.057 |
| Cost of certificate (in birrs)  | -0.009***   | -0.011 to -0.008 | -0.020***   | -0.022 to -0.017 |
| Waiting time (in hours)         | -0.108***   | -0.151 to -0.066 | -0.140***   | -0.202 to -0.077 |
| Distance (in hours)             | -0.563***   | -0.643 to -0.484 | -0.526***   | -0.618 to -0.433 |
| Number of visits                |             |                  |             |                  |
| Multiple visits                 | Ref         | --               | Ref         | --               |
| Single visit                    | 0.739***    | 0.609 to 0.869   | 0.640***    | 0.462 to 0.818   |
| Opening hours                   |             |                  |             |                  |
| Regular hours                   | Ref         | --               | Ref         | --               |
| Extended hours                  | 0.244**     | 0.093 to 0.396   | -0.023      | -0.250 to 0.203  |
| Weekend hours                   | 0.601***    | 0.426 to 0.776   | 0.495***    | 0.244 to 0.747   |
| Applicants                      |             |                  |             |                  |
| Both parents                    | Ref         | --               | Ref         | --               |
| Only one parent                 | 0.471***    | 0.328 to 0.613   | 0.154       | -0.047 to 0.355  |
| <b>Standard deviations (SD)</b> |             |                  |             |                  |
| Opt-out constant                | 2.427***    | 2.024 to 2.830   | 3.022***    | 2.377 to 3.667   |
| Cost of certificate (in birrs)  | 0.007***    | 0.006 to 0.008   | 0.012***    | 0.001 to 0.014   |
| Waiting time (in hours)         | 0.206***    | 0.135 to 0.276   | 0.166*      | 0.025 to 0.308   |
| Distance (in hours)             | 0.572***    | 0.483 to 0.661   | 0.417***    | 0.311 to 0.522   |
| Number of visits                |             |                  |             |                  |
| Multiple visits                 | Ref         | --               | Ref         | --               |
| Single visit                    | 0.371***    | 0.162 to 0.580   | 0.062       | -0.227 to 0.352  |
| Opening hours                   |             |                  |             |                  |
| Regular hours                   | Ref         | --               | Ref         | --               |
| Extended hours                  | 0.013       | -0.293 to 0.319  | 0.253       | -0.156 to 0.662  |
| Weekend hours                   | 0.072       | -0.362 to 0.507  | 0.118       | -0.329 to 0.566  |
| Applicants                      |             |                  |             |                  |
| Both parents                    | Ref         | --               | Ref         | --               |
| Only one parent                 | 0.463**     | 0.128 to 0.798   | 0.233       | -0.165 to 0.631  |
| <b>Model diagnostics</b>        |             |                  |             |                  |
| Number of choice sets           | 3,406       |                  | 1,832       |                  |
| Log likelihood                  | -2,321.473  |                  | -1,128.773  |                  |
| Likelihood ratio $\chi_2$       | 844.8***    |                  | 571.18***   |                  |

**Table S2-1: Results from mixed logit models of DCE data, including only respondents who correctly selected the preferable facility in the choice set with a dominant option.**

Notes: Mixed logit models were fitted using the mixlogit command in Stata, from 500 Halton draws. SD refers to the standard deviation of the parameter estimate. \*\*\*  $p < 0.001$ , \*\*  $p < 0.01$ , \*  $p < 0.05$ . The likelihood ratio  $\chi_2$  tests the null hypothesis that all standard deviations are jointly equal to zero. This null hypothesis is rejected for both the urban and rural areas.
